# Supplementary material
Source: HighWire-hosted journal article supplement (https://srh.bmj.com/content/47/3/159)

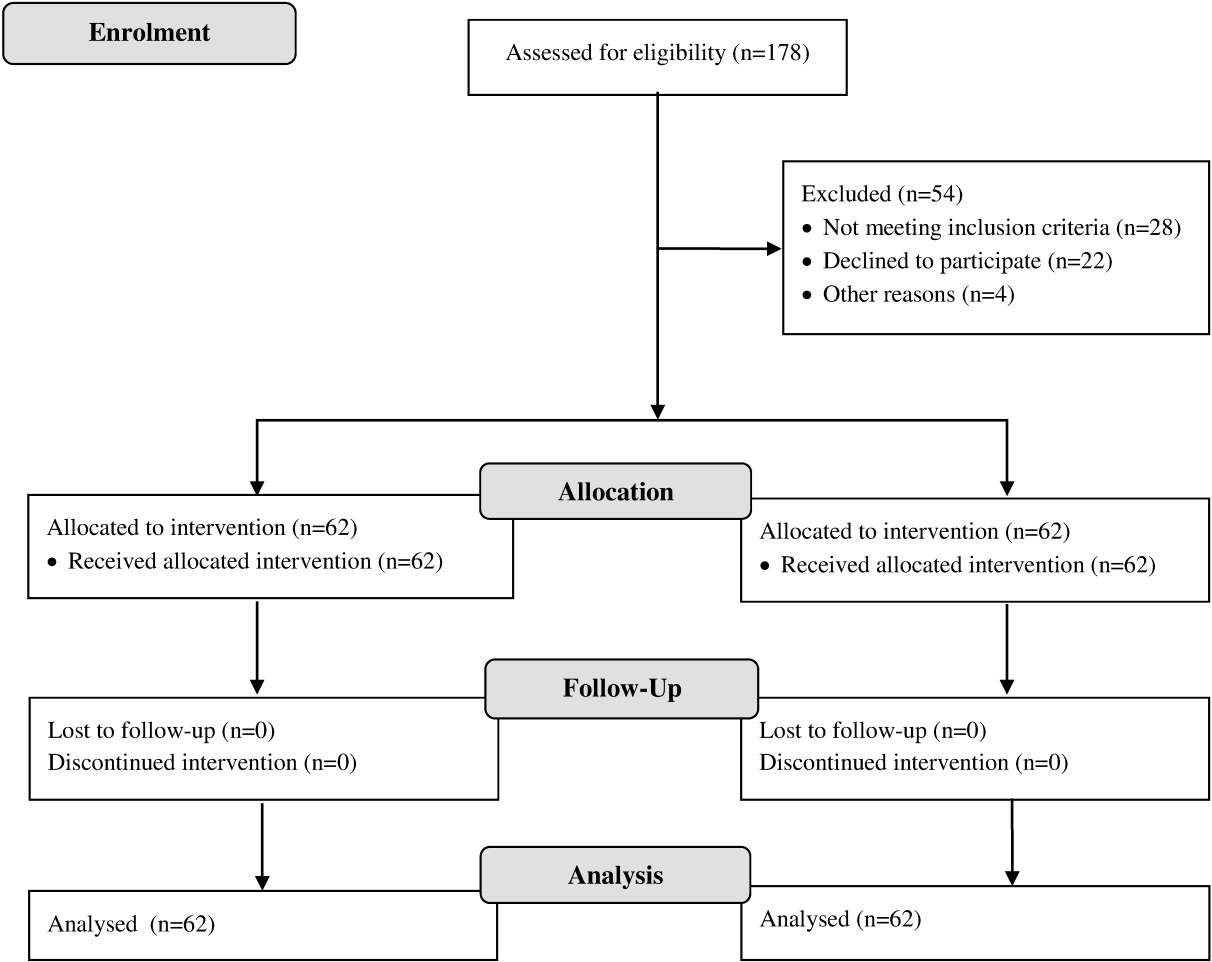

Supplemental figure 1 Consort Flow Diagram

Supplement: inline-supplementary-material-1 [file inline-supplementary-material-1.pdf]
